# Supplementary material
Source: publisher figshare collection journal article supplement (https://gsajournals.figshare.com/articles/dataset/_/13350800)
Supplement: Supplementary file 4 [file 1]

| Gene Name        | Gene ID   | Top Hit in <i>M. lewisii</i>  | Top Hit in <i>M. guttatus</i>   | Top Hit in <i>Arabidopsis</i> |
|------------------|-----------|-------------------------------|---------------------------------|-------------------------------|
| <i>Myb5a</i>     | Mlu_12200 | KJ011145.1 ( <i>NEGAN</i> )   | XM_012977147.1                  | AT1G66370 ( <i>ATMYB113</i> ) |
| <i>MlutbHLH1</i> | Mlu_20959 | KJ789366.1 ( <i>ANbHLH3</i> ) | XM_012977031.1                  | AT1G63650 ( <i>ATEGL3</i> )   |
| <i>MlutbHLH2</i> | Mlu_39530 | KJ789366.1 ( <i>ANbHLH3</i> ) | XM_012977031.1                  | AT4G09820 ( <i>ATTT8</i> )    |
| <i>MlutRTO1</i>  | Mlu_13044 | ML3G360900( <i>MRTO</i> )     | XM_012988553.1 ( <i>MgRTO</i> ) | AT4G01060 ( <i>CPL3</i> )     |
| <i>MlutRTO2</i>  | Mlu_33990 | ML3G360900( <i>MRTO</i> )     | XM_012988553.1 ( <i>MgRTO</i> ) | AT2G30432 ( <i>TCL1</i> )     |
| <i>MlutWD40a</i> | Mlu_09568 | KJ011139.1 ( <i>WD40a</i> )   | XM_012988050.1                  | AT5G24520 ( <i>ATTTG1</i> )   |
