# Supplementary material
Source: publisher figshare collection journal article supplement (https://gsajournals.figshare.com/articles/dataset/_/13350800)

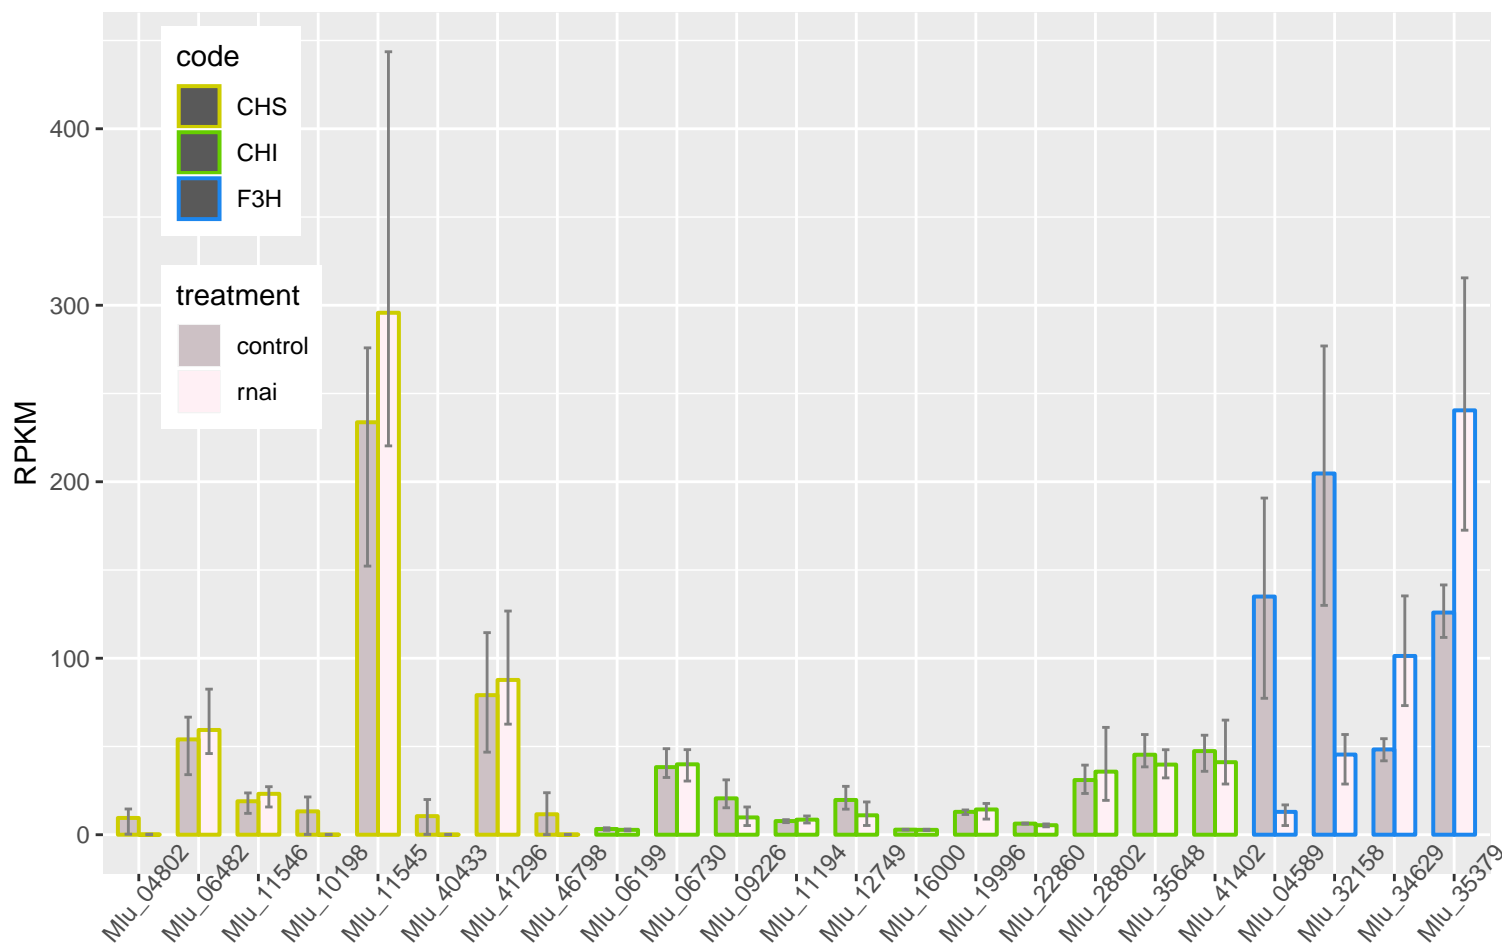

Supplement: Supplementary file 1 [file 1]

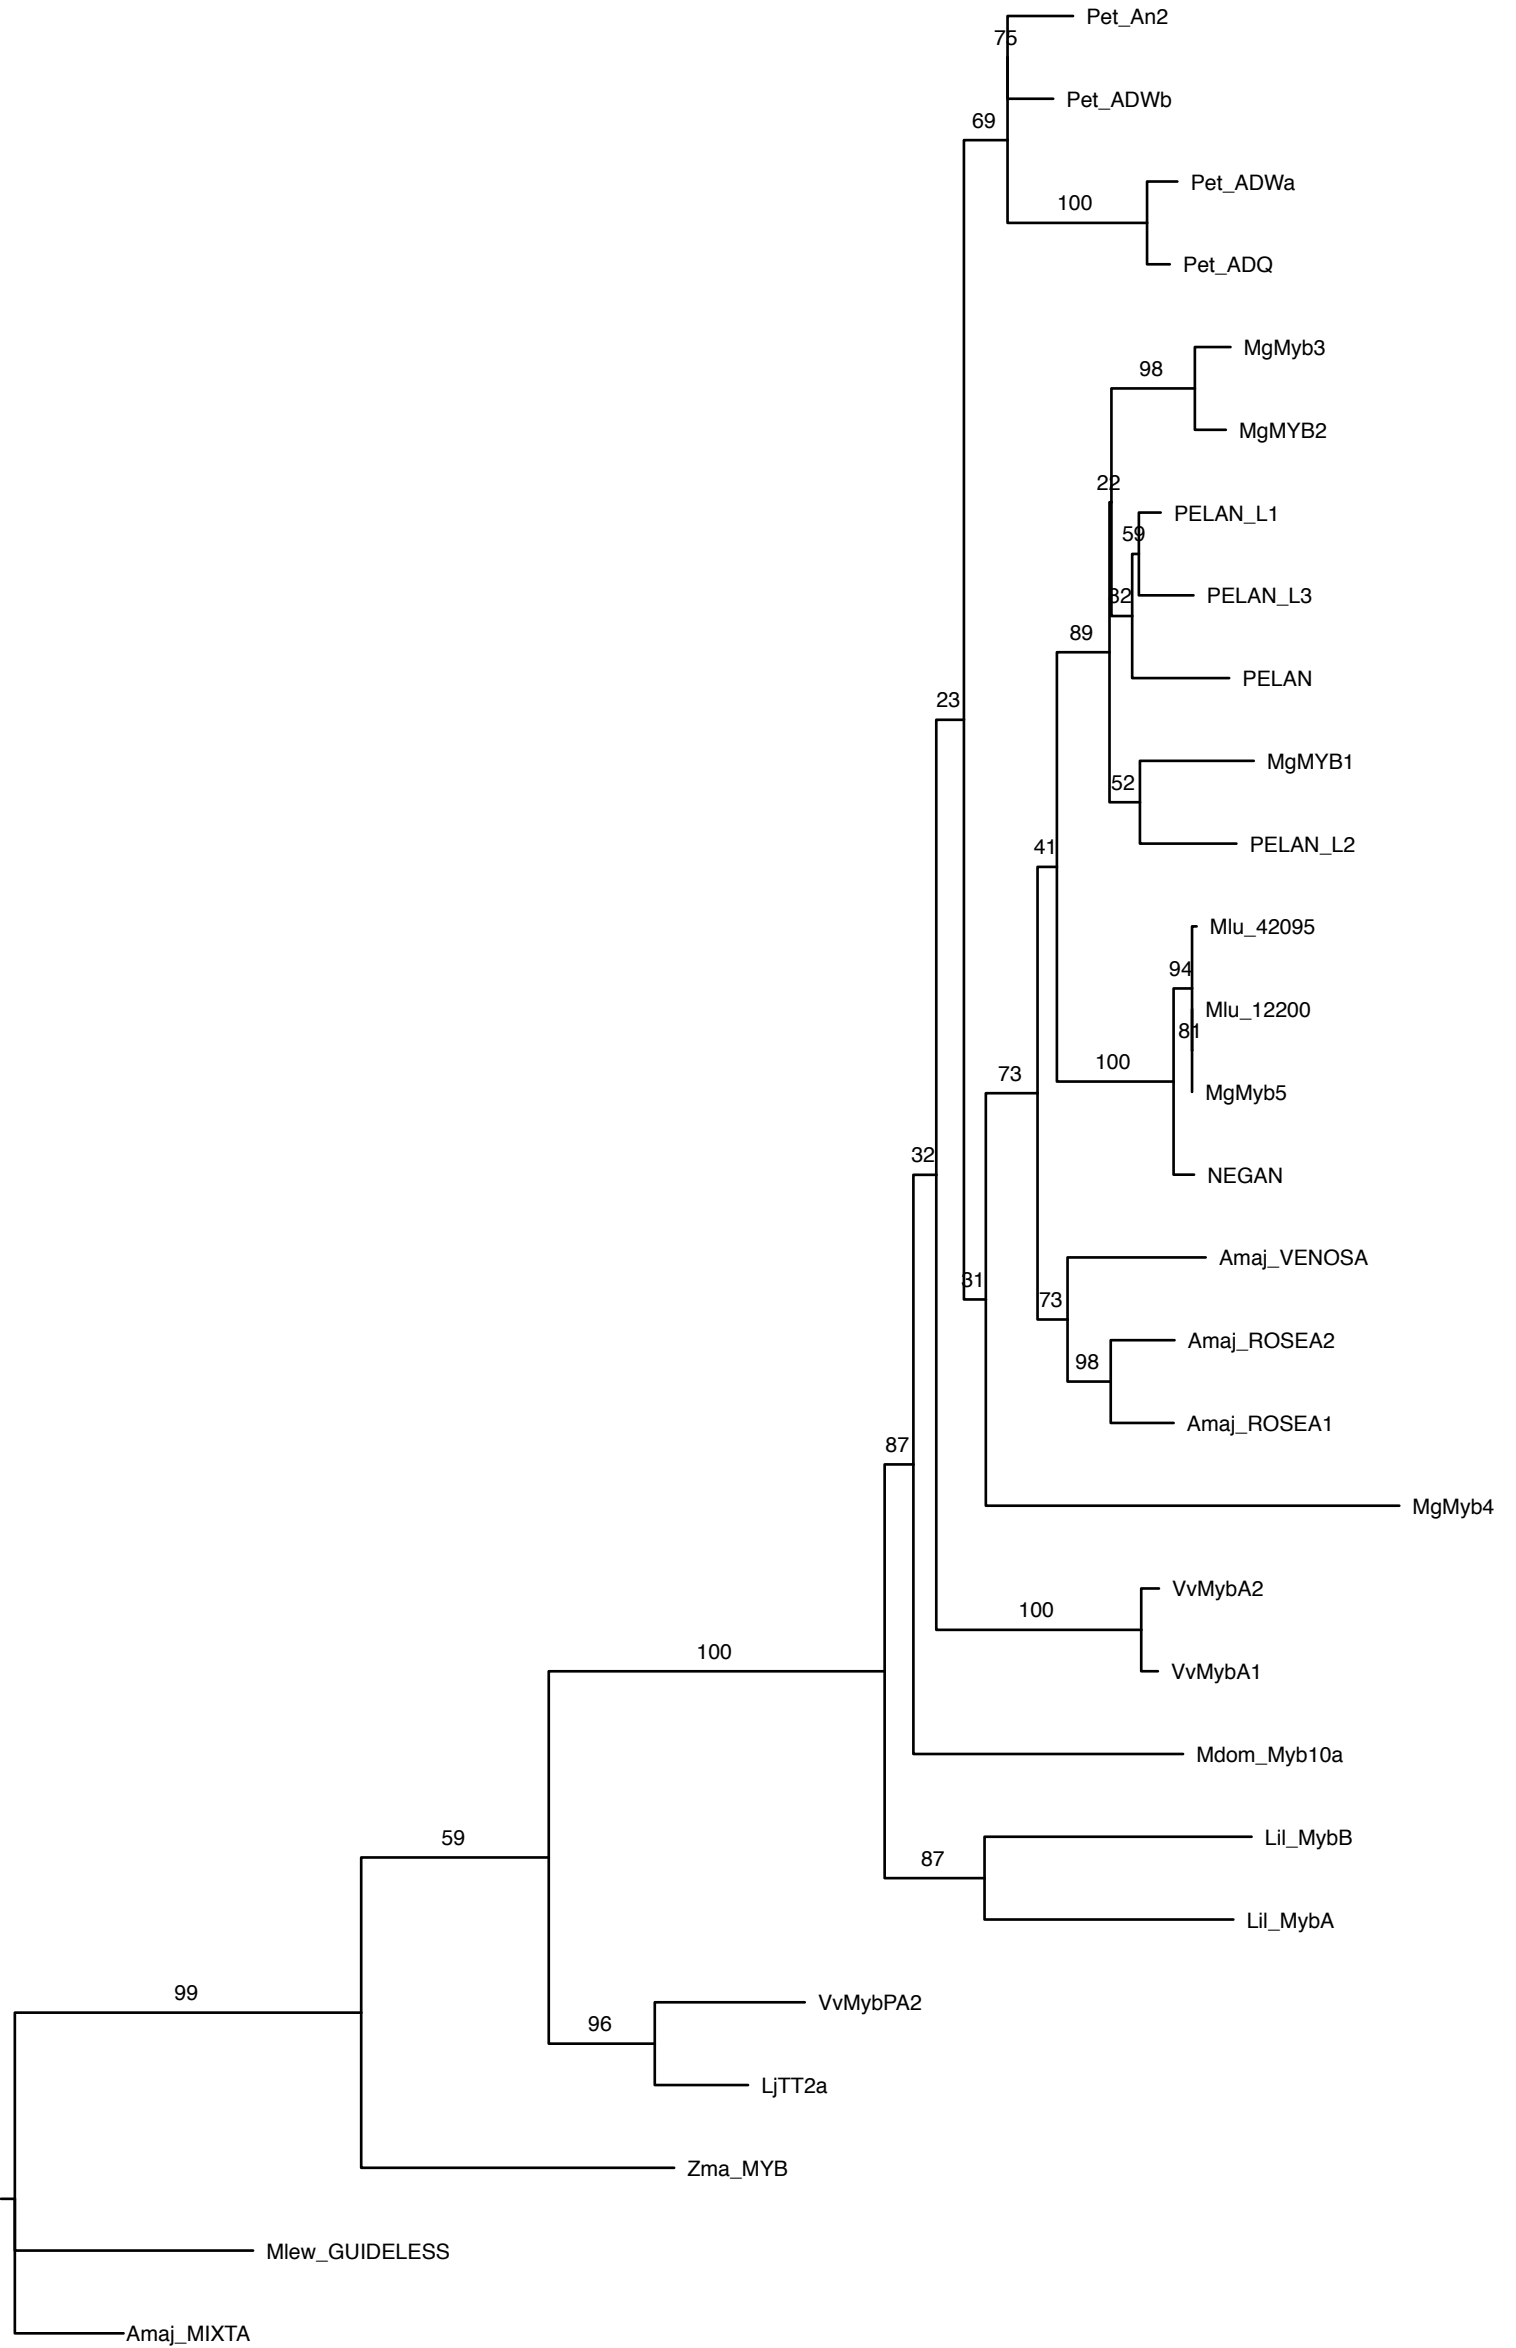

Supplement: Supplementary file 3 [file 1]

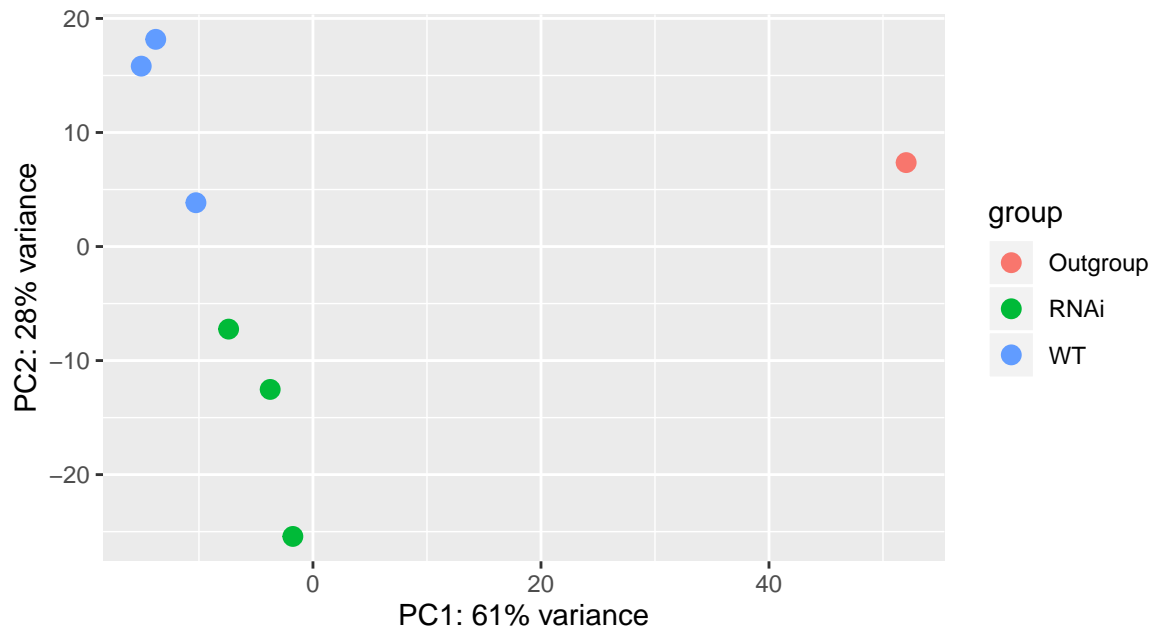

Supplement: Supplementary file 6 [file 1]

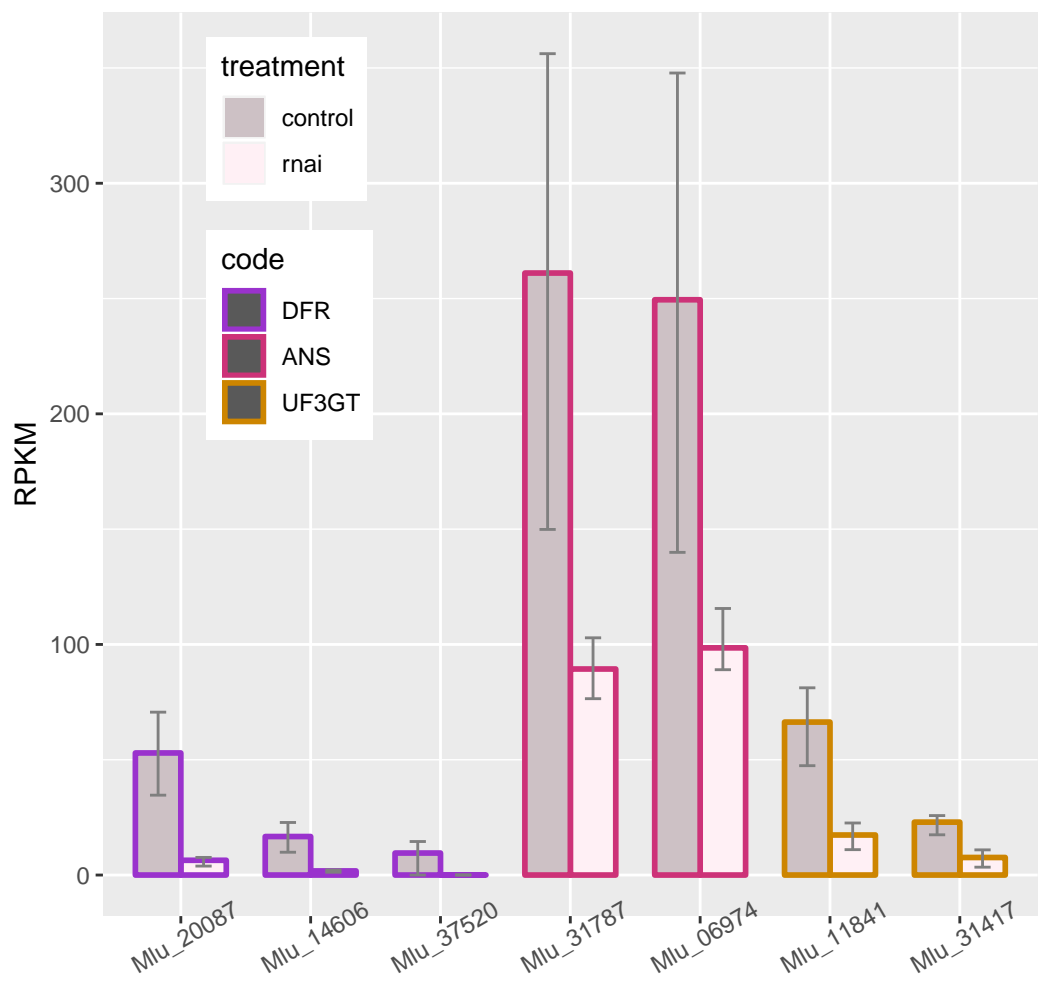

Supplement: Supplementary file 7 [file 1]
